# Supplementary material for: ACE-2 expression in the small airway epithelia of smokers and COPD patients: implications for COVID-19
Source: PubMed Central journal article supplement — Eur Respir J. 2020 May 14;55(5):2000688. doi: 10.1183/13993003.00688-2020 (PMC7144263; doi:10.1183/13993003.00688-2020), 2020-05-14
Supplement: ERJ-00688-2020.Shareable.pdf [file ERJ-00688-2020.Shareable.pdf]

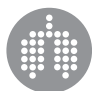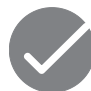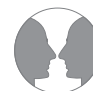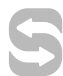

SHAREABLE PDF

# ACE-2 expression in the small airway epithelia of smokers and COPD patients: implications for COVID-19

Janice M. Leung<sup>1,2,3</sup>, Chen X. Yang<sup>1,2,3</sup>, Anthony Tam<sup>1,2,3</sup>,  
Tawimas Shaipanich<sup>2,3</sup>, Tillie-Louise Hackett<sup>2,3,4</sup>, Gurpreet K. Singhera<sup>1,2,3</sup>,  
Delbert R. Dorscheid<sup>1,2,3</sup> and Don D. Sin<sup>1,2,3</sup>

**Affiliations:** <sup>1</sup>University of British Columbia (UBC) Centre for Heart Lung Innovation, Vancouver, BC, Canada. <sup>2</sup>Dept of Medicine (Division of Respiratory), University of British Columbia, Vancouver, BC, Canada. <sup>3</sup>St Paul's Hospital, Providence Health Care, Vancouver, BC, Canada. <sup>4</sup>Dept of Anesthesia, Pharmacology and Therapeutics, University of British Columbia, Vancouver, BC, Canada.

**Correspondence:** Don D. Sin, UBC Centre for Heart Lung Innovation, St Paul's Hospital, 1081 Burrard Street, Vancouver, BC V6Z1Y6, Canada. E-mail: don.sin@hli.ubc.ca

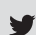

@ERSpublications

**Smokers and those with COPD have increased airway expression of ACE-2, which is the entry receptor for the COVID-19 virus. This may explain the increased risk of severe COVID-19 in these subpopulations and highlight the importance of smoking cessation.** <https://bit.ly/3bC29es>

**Cite this article as:** Leung JM, Yang CX, Tam A, *et al.* ACE-2 expression in the small airway epithelia of smokers and COPD patients: implications for COVID-19. *Eur Respir J* 2020; 55: 2000688 [<https://doi.org/10.1183/13993003.00688-2020>].

This single-page version can be shared freely online.

## To the Editor:

The World Health Organization (WHO) has declared coronavirus disease 2019 (COVID-19) a pandemic [1]. COVID-19 is caused by severe acute respiratory syndrome coronavirus 2 (SARS-CoV-2). COVID-19 displays symptoms ranging from mild to severe (pneumonia) that can lead to death in some individuals [2–4]. As of 18 April 2020, there have been 2 280 945 cases of COVID-19 worldwide and 156 354 deaths [5]. SARS-CoV-2 uses the angiotensin-converting enzyme II (ACE-2) as the cellular entry receptor [6]. While the virus can infect individuals of any age, to date, most of the severe cases have been described in those >55 years of age and with significant comorbidities, such as COPD [7]. Here, we determined whether patients with COPD have increased expression of ACE-2 in bronchial epithelial cells in the lower respiratory tract.
